# Supplementary material
Source: PubMed Central journal article supplement (PMC8716674)
Supplement: NIHMS1722159-supplement-Supplmentary_Table_1.pdf [file NIHMS1722159-supplement-Supplmentary_Table_1.pdf]

## TCGA Abbreviation

| Abbreviation | Full name                                                        |
|--------------|------------------------------------------------------------------|
| ACC          | Adrenocortical carcinoma                                         |
| BLCA         | Bladder Urothelial Carcinoma                                     |
| BRCA         | Breast invasive carcinoma                                        |
| CESC         | Cervical squamous cell carcinoma and endocervical adenocarcinoma |
| CHOL         | Cholangio carcinoma                                              |
| COAD         | Colon adenocarcinoma                                             |
| DLBC         | Lymphoid Neoplasm Diffuse Large B-cell Lymphoma                  |
| ESCA         | Esophageal carcinoma                                             |
| GBM          | Glioblastoma multiforme                                          |
| HNSC         | Head and Neck squamous cell carcinoma                            |
| KICH         | Kidney Chromophobe                                               |
| KIRC         | Kidney renal clear cell carcinoma                                |
| KIRP         | Kidney renal papillary cell carcinoma                            |
| LAML         | Acute Myeloid Leukemia                                           |
| LGG          | Brain Lower Grade Glioma                                         |
| LIHC         | Liver hepatocellular carcinoma                                   |
| LUAD         | Lung adenocarcinoma                                              |
| LUSC         | Lung squamous cell carcinoma                                     |
| MESO         | Mesothelioma                                                     |
| OV           | Ovarian serous cystadenocarcinoma                                |
| PAAD         | Pancreatic adenocarcinoma                                        |
| PCPG         | Pheochromocytoma and Paraganglioma                               |
| PRAD         | Prostate adenocarcinoma                                          |
| READ         | Rectum adenocarcinoma                                            |
| SARC         | Sarcoma                                                          |
| SKCM         | Skin Cutaneous Melanoma                                          |
| STAD         | Stomach adenocarcinoma                                           |
| TGCT         | Testicular Germ Cell Tumors                                      |
| THCA         | Thyroid carcinoma                                                |
| THYM         | Thymoma                                                          |
| UCEC         | Uterine Corpus Endometrial Carcinoma                             |
| UCS          | Uterine Carcinosarcoma                                           |
| UVM          | Uveal Melanoma                                                   |

## **Wnt signaling pathway components**

WNT1

WNT10A

WNT10B

WNT11

WNT16

WNT2

WNT2B

WNT3

WNT3A

WNT4

WNT5A

WNT5B

WNT6

WNT7A

WNT7B

WNT8A

WNT8B

WNT9A

WNT9B

FZD1

FZD2

FZD3

FZD4

FZD5

FZD6

FZD7

FZD8

FZD9

FZD10

RSPO1

RSPO2

RSPO3

RSPO4

DKK1

DKK2

DKK3

DKK4

SFRP1

SFRP2

SFRP4

SFRP5

LRP4

LRP5

LRP6

LGR4  
LGR5  
LGR6  
APC  
APC2  
AXIN1  
CSNK1E  
CTNNB1  
ZNRF3  
DVL1  
DVL2  
DVL3  
CTNNB1  
TCF7L2  
LEF1  
ROR2
